# Supplementary material for: Cytoplasmic Male Sterility-Associated Chimeric Open Reading Frames Identified by Mitochondrial Genome Sequencing of Four Cajanus Genotypes
Source: PubMed Central journal article supplement (PMC3789559; doi:10.1093/dnares/dst025), 2013-06-20
Supplement: supp_dst025_dst025supp.pdf [file supp_dst025_dst025supp.pdf]

**Table S1:** Details on 24 primer pairs designed from the end-sequences of the scaffolds to confirm the orientation in the mitochondrial genome assembly of ICPA 2039.

| Primer name | Forward primer (5'-3')  | Reverse primer (5'-3') | Tm (°C) | Product size (bp) |
|-------------|-------------------------|------------------------|---------|-------------------|
| *CcMtM01    | AGGAGACAGCTGATGGTGCT    | CCTTGGGGGATACACCTTCT   | 60.017  | 132               |
| CcMtM02     | CCCAGCTAAAGCGAATCTCA    | ACTGGTGCTTACACCGAAGC   | 60.481  | 106               |
| CcMtM03     | TATCTTGCTTGAGAGGGGGA    | GAACTCAAAGAGCGAGCCAC   | 59.767  | 215               |
| CcMtM04     | TAGCGAAGGAGAGGGTGAGA    | GCAATGATTCAGACGCAGA    | 60.088  | 257               |
| CcMtM05     | GGAGGTTGAGGTCTGTGTCC    | TGAGGCTAGGCCTTATTGGA   | 59.534  | 181               |
| CcMtM06     | AGGCCAACAACCTAAAAGG     | AAGGTACGGAGTCGCTCAAC   | 60.345  | 228               |
| CcMtM07     | CTCGAGTTTCTTGGTCGGTC    | TTTCTCAGGGGATGAGGTTG   | 59.844  | 153               |
| CcMtM08     | TAAAGCAGTGTGCGTCATCC    | CGCCCACCTCATTATATCT    | 59.871  | 115               |
| CcMtM09     | GAGCATAAGGATTAGCAGAATCG | CAAGTGCTACGAGTGCTTCG   | 59.411  | 104               |
| CcMtM10     | TGGGTCCAAAGGACAGGTAG    | AGAAAATCTGCCTCCAGCAA   | 59.959  | 139               |
| CcMtM11     | CCAACCTCTCGAAATCCAAA    | TCAGATGATTTGTGGACGGA   | 60.044  | 107               |
| CcMtM12     | ACAGACCAAGCAAGGGCTTA    | AGGGGCTTAAAGGAGTTTCG   | 59.875  | 147               |
| CcMtM13     | CTGAGAGAAGGCCTGTGACC    | ATTATTTCCACCCCTCGTC    | 59.986  | 273               |
| CcMtM14     | ACCCACAATCAGCCAAGTTC    | CGAGGTCTCAACGAAAGGAG   | 59.973  | 185               |
| CcMtM15     | ACTCCGTGCAGGAAAGACTC    | GAGCGCCTGTAATAAGTGC    | 59.455  | 238               |
| CcMtM16     | CGGGGTTTGATAGTTGCAGT    | CAATCCCTCTTTCTGAAGCG   | 59.993  | 111               |
| CcMtM17     | AAAAGCGTGTTCCTTCAGA     | TAAAGGAAAGGCTCGACGAA   | 59.853  | 142               |
| CcMtM18     | TTCCACTTGCTTTCTCGCTT    | AGTTGGTGAAACCTGAGCGT   | 60.132  | 187               |
| CcMtM19     | CCTCTTCCAGGAATGAACA     | AAGCAAATAGATAGCCCCCG   | 60.042  | 168               |
| CcMtM20     | TGCTCTCTTGCTACGGGATT    | ACGCTGGTCCATCACTTACC   | 59.978  | 203               |
| CcMtM21     | CCTCGTGGGGAAAGATAAGA    | TATCTCCCCCTTGCCTTTTT   | 59.122  | 234               |
| CcMtM22     | CAGAACGAATCTCTTATCGCC   | ACTCCAGTCCTACCCCGTCT   | 58.941  | 175               |
| CcMtM23     | GTTTCGGTACGAAAGCCTGA    | TCCGTCTTGCCTTTGCTACT   | 60.249  | 202               |
| CcMtM24     | AGTCCCGGGATCGTAAAGTT    | TGTCACAAGGAAGGTGGTCA   | 59.827  | 146               |

\*CcMtM: *Cajanus cajan* mitochondria marker.

**Table S2:** Genes in pigeonpea mitochondrial genome (ICPA2039)

| Genes                  | Size        | Coordinates |        | Strand   | Organism with top hit     |
|------------------------|-------------|-------------|--------|----------|---------------------------|
|                        |             | From        | To     |          |                           |
| I. Complex I genes     |             |             |        |          |                           |
| <i>nad1a</i>           | 383         | 82256       | 81873  | -        | <i>Vigna radiata</i>      |
| <i>nad1b</i>           | 88          | 302673      | 302761 | +        | <i>Vigna radiata</i>      |
| <i>nad1c</i>           | 194         | 303623      | 303817 | +        | <i>Vigna radiata</i>      |
| <i>nad1d</i>           | 86          | 371688      | 371774 | +        | <i>Vigna radiata</i>      |
| <i>nad1e</i>           | 254         | 374878      | 375132 | +        | <i>Vigna radiata</i>      |
| <b><i>nad1</i></b>     | <b>1005</b> | -           | -      | <b>x</b> | -                         |
| <i>nad2a</i>           | 152         | 175842      | 175994 | +        | <i>Vigna radiata</i>      |
| <i>nad2b</i>           | 401         | 177235      | 177636 | +        | <i>Vigna radiata</i>      |
| <i>nad2c</i>           | 158         | 335490      | 335332 | -        | <i>Vigna radiata</i>      |
| <i>nad2d</i>           | 638         | 332814      | 332176 | -        | <i>Vigna radiata</i>      |
| <i>nad2e</i>           | 170         | 330741      | 330571 | -        | <i>Vigna radiata</i>      |
| <b><i>nad2</i></b>     | <b>1519</b> | -           | -      | <b>x</b> | -                         |
| <i>nad3</i>            | 353         | 108269      | 108622 | +        | <i>Vigna radiata</i>      |
| <i>nad4a</i>           | 458         | 351289      | 351747 | +        | <i>Vigna radiata</i>      |
| <i>nad4b</i>           | 584         | 353136      | 353720 | +        | <i>Vigna radiata</i>      |
| <i>nad4c</i>           | 419         | 356763      | 357182 | +        | <i>Vigna radiata</i>      |
| <i>nad4d</i>           | 86          | 359741      | 359827 | +        | <i>Vigna radiata</i>      |
| <b><i>nad4</i></b>     | <b>1547</b> | -           | -      | +        | -                         |
| <i>nad4L</i>           | 296         | 294002      | 294271 | +        | <i>Vigna radiata</i>      |
| <i>nad5a</i>           | 236         | 45291       | 45055  | -        | <i>Vigna radiata</i>      |
| <i>nad5b</i>           | 1232        | 47332       | 46100  | -        | <i>Vigna radiata</i>      |
| <i>nad5c</i>           | 395         | 313079      | 313474 | +        | <i>Vigna radiata</i>      |
| <i>nad5d</i>           | 137         | 314387      | 314524 | +        | <i>Vigna radiata</i>      |
| <b><i>nad5</i></b>     | <b>2000</b> | -           | -      | <b>x</b> | -                         |
| <i>nad6</i>            | 614         | 79231       | 78617  | -        | <i>Vigna radiata</i>      |
| <i>nad7a</i>           | 161         | 164750      | 164589 | -        | <i>Vigna radiata</i>      |
| <i>nad7b</i>           | 101         | 163739      | 163638 | -        | <i>Cucurbita pepo</i>     |
| <i>nad7c</i>           | 464         | 162302      | 161838 | -        | <i>Vigna radiata</i>      |
| <i>nad7d</i>           | 245         | 160788      | 160543 | -        | <i>Vigna radiata</i>      |
| <i>nad7e</i>           | 323         | 158734      | 158411 | -        | <i>Vigna radiata</i>      |
| <b><i>nad7</i></b>     | <b>1294</b> | -           | -      | -        | -                         |
| <i>nad9</i>            | 569         | 433769      | 434338 | +        | <i>Vigna radiata</i>      |
| II. Complex II genes   |             |             |        |          |                           |
| <i>sdh4</i>            | 239         | 261724      | 261963 | +        | <i>Citrullus lanatus</i>  |
| III. Complex III genes |             |             |        |          |                           |
| <i>cob</i>             | 1172        | 319048      | 320220 | +        | <i>Cycas taitungensis</i> |
| IV. Complex IV genes   |             |             |        |          |                           |

|                                   |             |        |        |          |                             |
|-----------------------------------|-------------|--------|--------|----------|-----------------------------|
| <i>cox1</i>                       | 1579        | 299624 | 301203 | +        | <i>Vigna radiata</i>        |
| <i>cox3</i>                       | 794         | 260999 | 261793 | +        | <i>Vigna radiata</i>        |
| V. Complex V genes                |             |        |        |          |                             |
| <i>atp1</i>                       | 1511        | 233337 | 231826 | -        | <i>Vigna radiata</i>        |
| <i>atp4</i>                       | 566         | 294470 | 295036 | +        | <i>Vigna radiata</i>        |
| <i>atp6</i>                       | 728         | 301    | 1029   | +        | <i>Carica papaya</i>        |
| <i>atp8</i>                       | 482         | 243540 | 244022 | +        | <i>Vigna radiata</i>        |
| <i>atp9</i>                       | 170         | 468828 | 468658 | -        | <i>Vigna radiata</i>        |
| VI. Cytochrome c biogenesis genes |             |        |        |          |                             |
| <i>ccmB</i>                       | 620         | 83549  | 82929  | -        | <i>Vigna radiata</i>        |
| <i>ccmC</i>                       | 740         | 34816  | 34076  | -        | <i>Vigna radiata</i>        |
| <i>ccmFCa</i>                     | 779         | 15633  | 14854  | -        | <i>Vigna radiata</i>        |
| <i>ccmFCb</i>                     | 566         | 11352  | 10786  | -        | <i>Vigna radiata</i>        |
| <b><i>ccmFC</i></b>               | <b>1345</b> | -      | -      | -        | -                           |
| <i>ccmFn</i>                      | 1733        | 37237  | 35504  | -        | <i>Vigna radiata</i>        |
| VII. Ribosomal protein genes      |             |        |        |          |                             |
| <i>rpl16</i>                      | 510         | 308657 | 309167 | +        | <i>Arabidopsis thaliana</i> |
| <i>rpl5</i>                       | 554         | 317272 | 317826 | +        | <i>Vigna radiata</i>        |
| <i>rps1</i>                       | 620         | 44252  | 44872  | +        | <i>Carica papaya</i>        |
| <i>rps10a</i>                     | 309         | 296174 | 296483 | +        | <i>Vigna radiata</i>        |
| <i>rps10b</i>                     | 107         | 299315 | 299422 | +        | <i>Vigna radiata</i>        |
| <b><i>rps10</i></b>               | <b>416</b>  | -      | -      | +        | -                           |
| <i>rps12</i>                      | 374         | 108674 | 109048 | +        | <i>Vigna radiata</i>        |
| <i>rps14</i>                      | 299         | 317837 | 318136 | +        | <i>Vigna radiata</i>        |
| <i>rps19a</i>                     | 68          | 507787 | 507719 | -        | <i>Cucurbita pepo</i>       |
| <i>rps19b</i>                     | 119         | 305180 | 305299 | +        | <i>Cucurbita pepo</i>       |
| <b><i>rps19</i></b>               | <b>187</b>  | -      | -      | <b>x</b> | -                           |
| <i>rps3a</i>                      | 74          | 305316 | 305390 | +        | <i>Beta vulgaris</i>        |
| <i>rps3b</i>                      | 1571        | 307156 | 308727 | +        | <i>Beta vulgaris</i>        |
| <b><i>rps3</i></b>                | <b>1645</b> | -      | -      | +        | -                           |
| <i>rps4</i>                       | 1037        | 60663  | 59626  | -        | <i>Vigna radiata</i>        |
| <i>rps7</i>                       | 89          | 34089  | 34000  | -        | <i>Citrullus lanatus</i>    |
| VIII. Other protein coding genes  |             |        |        |          |                             |
| <i>matR</i>                       | 2017        | 372328 | 374345 | +        | <i>Carica papaya</i>        |
| <i>mttB</i>                       | 722         | 395960 | 395238 | -        | <i>Nicotiana tabacum</i>    |
| IX. rRNA genes                    |             |        |        |          |                             |
| <i>rrn5</i>                       | 113         | 441424 | 441311 | -        | <i>Vigna radiata</i>        |
| <i>rrnL</i>                       | 3154        | 122673 | 119519 | -        | <i>Vigna radiata</i>        |
| <i>rrnS</i>                       | 1988        | 443580 | 441592 | -        | <i>Vigna radiata</i>        |
| X. tRNA genes                     |             |        |        |          |                             |

|                  |    |        |        |   |                             |
|------------------|----|--------|--------|---|-----------------------------|
| <i>trnN</i>      | 71 | 504005 | 503934 | - | <i>Beta vulgaris</i>        |
| <i>trnD</i>      | 73 | 349884 | 349811 | - | <i>Nicotiana tabacum</i>    |
| <i>trnC-1</i>    | 72 | 250520 | 250592 | + | <i>Vigna radiata</i>        |
| <i>trnC-2</i>    | 70 | 383649 | 383579 | - | <i>Vigna radiata</i>        |
| <i>trnQ</i>      | 71 | 381197 | 381126 | - | <i>Cucumis sativus</i>      |
| <i>trnE</i>      | 71 | 377238 | 377309 | + | <i>Arabidopsis thaliana</i> |
| <i>trnG</i>      | 71 | 507338 | 507267 | - | <i>Beta vulgaris</i>        |
| <i>trnH</i>      | 73 | 252351 | 252278 | - | <i>Cucumis sativus</i>      |
| <i>trnK-1</i>    | 72 | 421642 | 421570 | - | <i>Vigna radiata</i>        |
| <i>trnK-2</i>    | 72 | 526879 | 526807 | - | <i>Vigna radiata</i>        |
| <i>trnM-1</i>    | 73 | 119146 | 119073 | + | <i>Nicotiana tabacum</i>    |
| <i>trnM-2</i>    | 73 | 190371 | 190444 | + | <i>Nicotiana tabacum</i>    |
| <i>trnM-3</i>    | 73 | 243291 | 243364 | + | <i>Nicotiana tabacum</i>    |
| <i>trnM-4</i>    | 81 | 368552 | 368471 | - | <i>Zea mays</i>             |
| <i>trnM-5-cp</i> | 72 | 378147 | 378219 | + | <i>Citrullus lanatus</i>    |
| <i>trnF</i>      | 73 | 194491 | 194564 | + | <i>Vigna radiata</i>        |
| <i>trnP</i>      | 74 | 194824 | 194898 | + | <i>Cucumis sativus</i>      |
| <i>trnS</i>      | 87 | 194042 | 194129 | + | <i>Zea perennis</i>         |
| <i>trnW-cp</i>   | 73 | 445511 | 445438 | - | <i>Vigna radiata</i>        |
| <i>trnY</i>      | 82 | 503562 | 503480 | - | <i>Vigna radiata</i>        |

a. Boldface, sum of all exons; lower-case letters, exons of a protein-coding gene; hyphenated, copies of the same gene; cp, probable chloroplast origin. b. Plus and minus, coded by the forward and reverse strand; x, trans-spliced gene.

**Table S3:** Gene annotation of scaffolds derived from mitochondrial sequences of ICPH 2433.

| ScaffoldID  | Genes         | Size   | Coordinates |        | Strand                 | Organism with top hit       |
|-------------|---------------|--------|-------------|--------|------------------------|-----------------------------|
|             |               |        | From        | To     |                        |                             |
| Scaffold1   | <i>atp9</i>   | 221    | 35152       | 34931  | -                      | <i>Vigna radiata</i>        |
|             | <i>nad9</i>   | 569    | 94          | 663    | +                      | <i>Vigna radiata</i>        |
| Scaffold11  | <i>cox3</i>   | 794    | 1284        | 490    | -                      | <i>Vigna radiata</i>        |
|             | <i>sdh4</i>   | 239    | 559         | 320    | -                      | <i>Citrullus lanatus</i>    |
| Scaffold12  | <i>atp6</i>   | 749    | 543         | 1292   | +                      | <i>Carica papaya</i>        |
|             | <i>ccmB</i>   | 617    | 83861       | 83244  | -                      | <i>Vigna radiata</i>        |
|             | <i>ccmC</i>   | 737    | 35131       | 34394  | -                      | <i>Vigna radiata</i>        |
|             | <i>ccmFCa</i> | 780    | 15949       | 15169  | -                      | <i>Vigna radiata</i>        |
|             | <i>ccmFCb</i> | 565    | 11667       | 11102  | -                      | <i>Vigna radiata</i>        |
|             | <i>ccmFn</i>  | 1733   | 37553       | 35820  | -                      | <i>Vigna radiata</i>        |
|             | <i>nad1a</i>  | 383    | 82568       | 82185  | -                      | <i>Vigna radiata</i>        |
|             | <i>nad2a</i>  | 152    | 176155      | 176307 | +                      | <i>Vigna radiata</i>        |
|             | <i>nad2b</i>  | 401    | 177548      | 177949 | +                      | <i>Vigna radiata</i>        |
|             | <i>nad5a</i>  | 236    | 45369       | 45605  | +                      | <i>Vigna radiata</i>        |
|             | <i>nad5b</i>  | 1259   | 46387       | 47646  | +                      | <i>Vigna radiata</i>        |
|             | <i>nad6</i>   | 614    | 79543       | 78929  | -                      | <i>Vigna radiata</i>        |
|             | <i>nad7a</i>  | 161    | 165044      | 164883 | -                      | <i>Vigna radiata</i>        |
|             | <i>nad7b</i>  | 101    | 164033      | 163932 | -                      | <i>Cucurbita pepo</i>       |
|             | <i>nad7c</i>  | 464    | 162595      | 162131 | -                      | <i>Vigna radiata</i>        |
|             | <i>nad7d</i>  | 245    | 161081      | 160836 | -                      | <i>Vigna radiata</i>        |
|             | <i>nad7e</i>  | 323    | 159026      | 158703 | -                      | <i>Vigna radiata</i>        |
|             | <i>rps1</i>   | 620    | 44567       | 45187  | +                      | <i>Carica papaya</i>        |
|             | <i>rps12</i>  | 374    | 108970      | 109344 | +                      | <i>Vigna radiata</i>        |
|             | <i>rps4</i>   | 194    | 60217       | 60023  | -                      | <i>Vigna radiata</i>        |
|             | <i>rps7</i>   | 74     | 34404       | 34330  | -                      | <i>Citrullus lanatus</i>    |
|             | <i>trnM</i>   | 73     | 190693      | 190766 | +                      | <i>Nicotiana tabacum</i>    |
|             | <i>trnF</i>   | 73     | 194813      | 194886 | +                      | <i>Vigna radiata</i>        |
| <i>trnP</i> | 74            | 195144 | 195218      | +      | <i>Cucumis sativus</i> |                             |
| <i>trnS</i> | 87            | 194364 | 194451      | +      | <i>Zea perennis</i>    |                             |
| Scaffold13  | <i>atp1</i>   | 1511   | 14406       | 12895  | -                      | <i>Vigna radiata</i>        |
|             | <i>atp8</i>   | 479    | 24608       | 25087  | +                      | <i>Vigna radiata</i>        |
|             | <i>ccmB</i>   | 59     | 22783       | 22842  | +                      | <i>Vigna radiata</i>        |
|             | <i>nad5a</i>  | 107    | 12862       | 12755  | -                      | <i>Arabidopsis thaliana</i> |
|             | <i>trnC</i>   | 72     | 31587       | 31659  | +                      | <i>Vigna radiata</i>        |
|             | <i>trnH</i>   | 75     | 33343       | 33418  | -                      | <i>Beta vulgaris</i>        |
|             | <i>trnM</i>   | 73     | 24359       | 24432  | +                      | <i>Nicotiana tabacum</i>    |

|             |               |      |        |        |   |                             |
|-------------|---------------|------|--------|--------|---|-----------------------------|
| Scaffold17  | <i>atp1</i>   | 476  | 158466 | 157990 | - | <i>Nicotiana tabacum</i>    |
|             | <i>atp4</i>   | 569  | 32026  | 32595  | + | <i>Vigna radiata</i>        |
|             | <i>atp9</i>   | 65   | 13907  | 13842  | - | <i>Beta vulgaris</i>        |
|             | <i>cob</i>    | 1172 | 56638  | 57810  | + | <i>Vigna radiata</i>        |
|             | <i>cox1</i>   | 1580 | 37187  | 38767  | + | <i>Vigna radiata</i>        |
|             | <i>matR</i>   | 2002 | 109758 | 111760 | + | <i>Vigna radiata</i>        |
|             | <i>mttB</i>   | 722  | 133343 | 132621 | - | <i>Citrullus lanatus</i>    |
|             | <i>nad1b</i>  | 92   | 40244  | 40336  | + | <i>Vigna radiata</i>        |
|             | <i>nad1c</i>  | 194  | 41196  | 41390  | + | <i>Vigna radiata</i>        |
|             | <i>nad1e</i>  | 254  | 112252 | 112506 | + | <i>Vigna radiata</i>        |
|             | <i>nad2c</i>  | 158  | 73097  | 72939  | - | <i>Vigna radiata</i>        |
|             | <i>nad2d</i>  | 638  | 70419  | 69781  | - | <i>Vigna radiata</i>        |
|             | <i>nad2e</i>  | 185  | 68357  | 68172  | - | <i>Vigna radiata</i>        |
|             | <i>nad4a</i>  | 458  | 88644  | 89102  | + | <i>Vigna radiata</i>        |
|             | <i>nad4b</i>  | 584  | 90493  | 91077  | + | <i>Vigna radiata</i>        |
|             | <i>nad4c</i>  | 419  | 94122  | 94541  | + | <i>Vigna radiata</i>        |
|             | <i>nad4d</i>  | 86   | 97105  | 97191  | + | <i>Vigna radiata</i>        |
|             | <i>nad5c</i>  | 395  | 50665  | 51060  | + | <i>Vigna radiata</i>        |
|             | <i>nad5d</i>  | 137  | 51973  | 52110  | + | <i>Vigna radiata</i>        |
|             | <i>rpl16</i>  | 535  | 46215  | 46750  | + | <i>Arabidopsis thaliana</i> |
|             | <i>rpl5</i>   | 554  | 54859  | 55413  | + | <i>Vigna radiata</i>        |
|             | <i>rps10a</i> | 248  | 33793  | 34041  | + | <i>Vigna radiata</i>        |
|             | <i>rps10b</i> | 119  | 36865  | 36984  | + | <i>Vigna radiata</i>        |
|             | <i>rps14</i>  | 299  | 55424  | 55723  | + | <i>Vigna radiata</i>        |
|             | <i>rps19b</i> | 119  | 42756  | 42875  | + | <i>Cucurbita pepo</i>       |
|             | <i>rps3a</i>  | 74   | 42892  | 42966  | + | <i>Vigna radiata</i>        |
|             | <i>rps3b</i>  | 1583 | 44729  | 46312  | + | <i>Vigna radiata</i>        |
|             | <i>sdh4</i>   | 62   | 64990  | 64928  | - | <i>Citrullus lanatus</i>    |
|             | <i>trnM</i>   | 72   | 115524 | 115596 | + | <i>Vigna radiata</i>        |
|             | <i>trnC</i>   | 70   | 120961 | 121031 | - | <i>Cucumis sativus,</i>     |
|             | <i>trnQ</i>   | 71   | 118507 | 118578 | - | <i>Arabidopsis thaliana</i> |
|             | <i>trnE</i>   | 71   | 114612 | 114683 | + | <i>Vigna radiata</i>        |
|             | <i>trnK</i>   | 72   | 159140 | 159212 | - | <i>Citrullus lanatus</i>    |
| Scaffold101 | <i>rps19a</i> | 77   | 27798  | 27875  | + | <i>Carica papaya</i>        |
|             | <i>trnN</i>   | 71   | 31578  | 31649  | + | <i>Beta vulgaris</i>        |
|             | <i>trnG</i>   | 72   | 28246  | 28318  | + | <i>Beta vulgaris</i>        |
|             | <i>trnK</i>   | 72   | 8709   | 8781   | + | <i>Vigna radiata</i>        |
|             | <i>trnY</i>   | 82   | 32021  | 32103  | + | <i>Vigna radiata</i>        |

---

**Table S4:** Gene annotation of scaffolds derived from mitochondrial sequences of ICPW 29.

| ScaffoldID  | Genes        | Size   | Coordinates |        | Strand                 | Organism with top hit       |
|-------------|--------------|--------|-------------|--------|------------------------|-----------------------------|
|             |              |        | From        | To     |                        |                             |
| Scaffold1   | <i>atp1</i>  | 1511   | 98948       | 97437  | -                      | <i>Vigna radiata</i>        |
|             | <i>ccmB</i>  | 617    | 77628       | 78245  | +                      | <i>Vigna radiata</i>        |
|             | <i>cob</i>   | 1172   | 148380      | 149552 | +                      | <i>Vigna radiata</i>        |
|             | <i>cox3</i>  | 794    | 108456      | 109250 | +                      | <i>Vigna radiata</i>        |
|             | <i>matR</i>  | 2003   | 202103      | 204106 | +                      | <i>Vigna radiata</i>        |
|             | <i>mttB</i>  | 722    | 225652      | 224930 | -                      | <i>Citrullus lanatus</i>    |
|             | <i>nad1a</i> | 383    | 78921       | 79304  | +                      | <i>Vigna radiata</i>        |
|             | <i>nad1d</i> | 95     | 201394      | 201489 | +                      | <i>Vigna radiata</i>        |
|             | <i>nad1e</i> | 254    | 204598      | 204852 | +                      | <i>Vigna radiata</i>        |
|             | <i>nad2c</i> | 158    | 164840      | 164682 | -                      | <i>Vigna radiata</i>        |
|             | <i>nad2d</i> | 638    | 162161      | 161523 | -                      | <i>Vigna radiata</i>        |
|             | <i>nad2e</i> | 185    | 160099      | 159914 | -                      | <i>Vigna radiata</i>        |
|             | <i>nad3</i>  | 353    | 52916       | 52563  | -                      | <i>Vigna radiata</i>        |
|             | <i>nad4a</i> | 458    | 180979      | 181437 | +                      | <i>Vigna radiata</i>        |
|             | <i>nad4b</i> | 584    | 182829      | 183413 | +                      | <i>Vigna radiata</i>        |
|             | <i>nad4c</i> | 419    | 186460      | 186879 | +                      | <i>Vigna radiata</i>        |
|             | <i>nad4d</i> | 86     | 189445      | 189531 | +                      | <i>Vigna radiata</i>        |
|             | <i>nad5c</i> | 395    | 142404      | 142799 | +                      | <i>Vigna radiata</i>        |
|             | <i>nad5d</i> | 137    | 143712      | 143849 | +                      | <i>Vigna radiata</i>        |
|             | <i>nad6</i>  | 614    | 81947       | 82561  | -                      | <i>Vigna radiata</i>        |
|             | <i>rpl5</i>  | 554    | 146598      | 147152 | +                      | <i>Vigna radiata</i>        |
|             | <i>rps12</i> | 374    | 52511       | 52137  | +                      | <i>Vigna radiata</i>        |
|             | <i>rps14</i> | 299    | 147163      | 147462 | +                      | <i>Vigna radiata</i>        |
|             | <i>sdh4</i>  | 239    | 109181      | 109420 | +                      | <i>Citrullus lanatus</i>    |
|             | <i>trnD</i>  | 73     | 179499      | 179572 | -                      | <i>Nicotiana tabacum</i>    |
|             | <i>trnC</i>  | 70     | 213262      | 213332 | +                      | <i>Vigna radiata</i>        |
|             | <i>trnQ</i>  | 71     | 210808      | 210879 | -                      | <i>Cucumis sativus</i>      |
|             | <i>trnE</i>  | 71     | 206958      | 207029 | +                      | <i>Arabidopsis thaliana</i> |
|             | <i>trnM</i>  | 72     | 41732       | 41804  | +                      | <i>Nicotiana tabacum</i>    |
|             | <i>trnM</i>  | 72     | 207870      | 207942 | +                      | <i>Citrullus lanatus</i>    |
| <i>trnF</i> | 73           | 241150 | 241223      | -      | <i>Vigna radiata</i>   |                             |
| <i>trnP</i> | 74           | 240817 | 240891      | -      | <i>Cucumis sativus</i> |                             |
| <i>trnS</i> | 87           | 241585 | 241672      | -      | <i>Zea perennis</i>    |                             |
| Scaffold2   | <i>ccmC</i>  | 737    | 10172       | 9435   | -                      | <i>Vigna radiata</i>        |
|             | <i>ccmFn</i> | 1733   | 12593       | 10860  | -                      | <i>Vigna radiata</i>        |
|             | <i>nad5b</i> | 1193   | 21696       | 22889  | +                      | <i>Vigna radiata</i>        |

|           |                |      |        |        |   |                             |
|-----------|----------------|------|--------|--------|---|-----------------------------|
|           | <i>nad7a</i>   | 161  | 142571 | 142410 | - | <i>Vigna radiata</i>        |
|           | <i>nad7b</i>   | 101  | 141560 | 141459 | - | <i>Cucurbita pepo</i>       |
|           | <i>nad7c</i>   | 464  | 140122 | 139658 | - | <i>Vigna radiata</i>        |
|           | <i>nad7d</i>   | 245  | 138608 | 138363 | - | <i>Vigna radiata</i>        |
|           | <i>nad7e</i>   | 323  | 136551 | 136228 | - | <i>Vigna radiata</i>        |
|           | <i>nad9</i>    | 491  | 93404  | 93895  | + | <i>Vigna radiata</i>        |
|           | <i>rps1</i>    | 620  | 19608  | 20228  | + | <i>Carica papaya</i>        |
|           | <i>rps12</i>   | 149  | 42211  | 42360  | + | <i>Vigna radiata</i>        |
|           | <i>rps14</i>   | 68   | 36215  | 36147  | - | <i>Vigna radiata</i>        |
|           | <i>rps19a</i>  | 77   | 64757  | 64680  | - | <i>Carica papaya</i>        |
|           | <i>rps19b</i>  | 59   | 156654 | 156713 | + | <i>Carica papaya</i>        |
|           | <i>rps4</i>    | 1037 | 35953  | 34916  | - | <i>Vigna radiata</i>        |
|           | <i>rps7</i>    | 74   | 9445   | 9371   | - | <i>Citrullus lanatus</i>    |
|           | <i>trnN</i>    | 71   | 60615  | 60686  | - | <i>Beta vulgaris</i>        |
|           | <i>trnC</i>    | 72   | 151173 | 151245 | - | <i>Vignaradiata</i>         |
|           | <i>trnG</i>    | 72   | 64237  | 64309  | - | <i>Beta vulgaris</i>        |
|           | <i>trnH</i>    | 75   | 149413 | 149488 | - | <i>Beta vulgaris</i>        |
|           | <i>trnK</i>    | 72   | 84781  | 84853  | - | <i>Vigna radiata</i>        |
|           | <i>trnW-cp</i> | 73   | 104998 | 105071 | - | <i>Vigna_radiata</i>        |
|           | <i>trnY</i>    | 82   | 60161  | 60243  | - | <i>Vigna_radiata</i>        |
| Scaffold3 | <i>atp4</i>    | 569  | 8368   | 7799   | - | <i>Vigna radiata</i>        |
|           | <i>atp6</i>    | 1154 | 61500  | 60346  | - | <i>Nicotiana tabacum</i>    |
|           | <i>atp8</i>    | 479  | 90319  | 90798  | + | <i>Vigna radiata</i>        |
|           | <i>atp9</i>    | 65   | 27204  | 27269  | + | <i>Beta vulgaris</i>        |
|           | <i>ccmFCa</i>  | 779  | 45898  | 46677  | + | <i>Vigna radiata</i>        |
|           | <i>ccmFCb</i>  | 566  | 50179  | 50745  | + | <i>Vigna radiata</i>        |
|           | <i>cox1</i>    | 1580 | 3207   | 1627   | - | <i>Vigna radiata</i>        |
|           | <i>nad1b</i>   | 92   | 149    | 57     | - | <i>Vigna radiata</i>        |
|           | <i>nad2a</i>   | 152  | 75639  | 75791  | + | <i>Vigna radiata</i>        |
|           | <i>nad2b</i>   | 401  | 77032  | 77433  | + | <i>Vigna radiata</i>        |
|           | <i>nad4L</i>   | 296  | 8863   | 8567   | - | <i>Vigna radiata</i>        |
|           | <i>rps10a</i>  | 248  | 6601   | 6353   | - | <i>Vigna radiata</i>        |
|           | <i>rps10b</i>  | 119  | 3529   | 3410   | - | <i>Vigna radiata</i>        |
|           | <i>trnM</i>    |      |        |        |   | <i>Nicotiana tabacum</i>    |
| Scaffold9 | <i>nad1c</i>   | 194  | 847    | 1041   | + | <i>Vigna radiata</i>        |
|           | <i>rpl16</i>   | 511  | 5890   | 6401   | + | <i>Arabidopsis thaliana</i> |
|           | <i>rps19b</i>  | 119  | 2407   | 2526   | + | <i>Cucurbita pepo</i>       |
|           | <i>rps3a</i>   | 74   | 2543   | 2617   | + | <i>Vigna radiata</i>        |
|           | <i>rps3b</i>   | 1583 | 4380   | 5963   | + | <i>Vigna radiata</i>        |

---



**Table S5:** Gene annotation of scaffolds derived from mitochondrial sequences of ICPB 2039.

| ScaffoldID | Genes          | Size | Coordinates |       | Strand | Organism with top hit       |
|------------|----------------|------|-------------|-------|--------|-----------------------------|
|            |                |      | From        | To    |        |                             |
| Scaffold10 | <i>nad2a</i>   | 152  | 2143        | 1991  | -      | <i>Vigna radiata</i>        |
|            | <i>nad2b</i>   | 401  | 750         | 349   | -      | <i>Vigna radiata</i>        |
|            | <i>rps10</i>   | 47   | 2296        | 2249  | -      | <i>Vigna radiata</i>        |
| Scaffold13 | <i>nad3</i>    | 77   | 180         | 103   | -      | <i>Vigna radiata</i>        |
|            | <i>rps12</i>   | 173  | 6067        | 6240  | +      | <i>Brassica napus</i>       |
|            | <i>rps14</i>   | 68   | 96          | 28    | -      | <i>Vigna radiata</i>        |
| Scaffold1  | <i>nad3</i>    | 353  | 14036       | 13683 | -      | <i>Vigna radiata</i>        |
|            | <i>rps12</i>   | 374  | 13631       | 13257 | -      | <i>Vigna radiata</i>        |
| Scaffold30 | <i>rps19</i>   | 77   | 4068        | 3991  | -      | <i>Carica papaya</i>        |
|            | <i>trnN</i>    | 71   | 216         | 287   | -      | <i>Beta vulgaris</i>        |
|            | <i>trnG</i>    | 71   | 3548        | 3619  | -      | <i>Beta vulgaris</i>        |
| Scaffold31 | <i>ccmFn</i>   | 455  | 458         | 3     | -      | <i>Vigna radiata</i>        |
| Scaffold33 | <i>atp9</i>    | 221  | 3980        | 3759  | -      | <i>Vigna radiata</i>        |
| Scaffold34 | <i>matR</i>    | 164  | 1616        | 1452  | -      | <i>Vigna radiata</i>        |
|            | <i>nad1</i>    | 254  | 960         | 706   | -      | <i>Vigna radiata</i>        |
|            | <i>trnE</i>    | 70   | 4851        | 4921  | -      | <i>Arabidopsis thaliana</i> |
|            | <i>trnM</i>    | 72   | 3938        | 4010  | -      | <i>Citrullus lanatus</i>    |
| Scaffold3  | <i>ccmB</i>    | 59   | 1956        | 2015  | +      | <i>Vigna radiata</i>        |
|            | <i>cox3</i>    | 794  | 7881        | 7087  | -      | <i>Vigna radiata</i>        |
|            | <i>sdh4</i>    | 323  | 7156        | 6833  | -      | <i>Citrullus lanatus</i>    |
| Scaffold45 | <i>nad4</i>    | 419  | 2112        | 1693  | -      | <i>Vigna radiata</i>        |
| Scaffold49 | <i>nad2c</i>   | 158  | 1280        | 1438  | +      | <i>Vigna radiata</i>        |
| Scaffold7  | <i>nad9</i>    | 570  | 15190       | 14620 | -      | <i>Nicotiana tabacum</i>    |
| Scaffold16 | <i>trnK</i>    | 72   | 1549        | 1621  | +      | <i>Vigna radiata</i>        |
| Scaffold17 | <i>trnW-cp</i> | 73   | 7159        | 7232  | +      | <i>Vigna radiata</i>        |
| Scaffold25 | <i>trnM</i>    | 71   | 3331        | 3402  | +      | <i>Zea mays</i>             |
| Scaffold36 | <i>trnW-cp</i> | 73   | 7159        | 7232  | +      | <i>Vigna radiata</i>        |
| Scaffold5  | <i>trnF</i>    | 73   | 17592       | 17665 | -      | <i>Vigna radiata</i>        |
|            | <i>trnP</i>    | 74   | 17260       | 17334 | -      | <i>Cucumis sativus</i>      |
|            | <i>trnS</i>    | 87   | 18027       | 18114 | -      | <i>Zea perennis</i>         |
| Scaffold6  | <i>trnC</i>    | 70   | 10058       | 10128 | +      | <i>Vigna radiata</i>        |
|            | <i>trnQ</i>    | 71   | 13392       | 13463 | -      | <i>Cucumis sativus</i>      |

**Table S6:** Genomic rearrangements observed in ICPA 2039 while comparing with mitochondrial sequences of ICPB 2039, ICPW 29 and ICPH 2433 separately.

| <b>Rearrangement Regions</b> |           | <b>ICPA 2039/<br/>ICPB 2039</b> | <b>ICPA 2039/<br/>ICPW 29</b> | <b>ICPA 2039/<br/>ICPH 2433</b> |
|------------------------------|-----------|---------------------------------|-------------------------------|---------------------------------|
| <b>From</b>                  | <b>To</b> |                                 |                               |                                 |
| 3441                         | 7072      | ✓                               | -                             | -                               |
| 15709                        | 18693     | ✓                               | -                             | -                               |
| 34909                        | 165239    | ✓                               | -                             | -                               |
| 72614                        | 403154    | ✓                               | ✓                             | -                               |
| 107485                       | 219108    | -                               | ✓                             | -                               |
| 143366                       | 144892    | ✓                               | -                             | -                               |
| 164987                       | 165000    | -                               | ✓                             | -                               |
| 170658                       | 225317    | -                               | ✓                             | -                               |
| 187564                       | 399514    | ✓                               | -                             | -                               |
| 191084                       | 489849    | -                               | ✓                             | -                               |
| 193458                       | 195972    | ✓                               | -                             | -                               |
| 249675                       | 263641    | ✓                               | ✓                             | -                               |
| 251365                       | 253166    | ✓                               | -                             | -                               |
| 252598                       | 252974    | ✓                               | -                             | -                               |
| 262266                       | 401325    | ✓                               | ✓                             | -                               |
| 262352                       | 263295    | ✓                               | -                             | -                               |
| 262339                       | 401289    | -                               | ✓                             | -                               |
| 263124                       | 470227    | ✓                               | ✓                             | -                               |
| 275554                       | 471358    | ✓                               | -                             | -                               |
| 276013                       | 470845    | ✓                               | -                             | -                               |
| 298472                       | 298979    | ✓                               | -                             | -                               |
| 306210                       | 307224    | ✓                               | -                             | -                               |
| 342909                       | 344446    | ✓                               | -                             | -                               |
| 379049                       | 382176    | ✓                               | -                             | -                               |
| 433127                       | 484083    | ✓                               | -                             | -                               |
| 443386                       | 444100    | ✓                               | -                             | -                               |
| 446611                       | 451191    | ✓                               | -                             | -                               |

**Table S7:** No coverage regions observed in ICPA 2039 while comparing with mitochondrial sequences of ICPB 2039, ICPW 29 and ICPH 2433 separately.

| No Coverage Regions |        |        | ICPA 2039 /<br>ICPB 2039 | ICPA 2039/<br>ICPW 29 | ICPA 2039/<br>ICPH 2433 |
|---------------------|--------|--------|--------------------------|-----------------------|-------------------------|
| From                | To     | Length |                          |                       |                         |
| 489850              | 499083 | 9234   | ✓                        | -                     | -                       |
| 476053              | 484470 | 8418   | ✓                        | -                     | -                       |
| 212270              | 219837 | 7568   | ✓                        | -                     | -                       |
| 165134              | 170282 | 5149   | ✓                        | -                     | -                       |
| 419186              | 424114 | 4929   | ✓                        | -                     | -                       |
| 257348              | 262265 | 4918   | ✓                        | -                     | -                       |
| 531943              | 536388 | 4446   | ✓                        | -                     | -                       |
| 265782              | 269725 | 3944   | ✓                        | -                     | -                       |
| 69876               | 72608  | 2733   | ✓                        | -                     | -                       |
| 411099              | 413552 | 2454   | ✓                        | -                     | -                       |
| 309903              | 312076 | 2174   | ✓                        | -                     | -                       |
| 430061              | 432077 | 2017   | ✓                        | -                     | -                       |
| 157104              | 158668 | 1565   | ✓                        | -                     | -                       |
| 81894               | 83428  | 1535   | ✓                        | -                     | -                       |
| 324064              | 325537 | 1474   | ✓                        | -                     | -                       |
| 263655              | 265027 | 1373   | ✓                        | -                     | -                       |
| 222478              | 223535 | 1058   | ✓                        | -                     | -                       |
| 489860              | 499011 | 9152   | -                        | ✓                     | -                       |
| 476087              | 484001 | 7915   | -                        | ✓                     | -                       |
| 212269              | 219101 | 6833   | -                        | ✓                     | -                       |
| 257348              | 262265 | 4918   | -                        | ✓                     | -                       |
| 419548              | 424117 | 4570   | -                        | ✓                     | -                       |
| 166121              | 170233 | 4113   | -                        | ✓                     | -                       |
| 265782              | 269725 | 3944   | -                        | ✓                     | -                       |
| 69913               | 72520  | 2608   | -                        | ✓                     | -                       |
| 411099              | 413510 | 2412   | -                        | ✓                     | -                       |
| 430061              | 432077 | 2017   | -                        | ✓                     | -                       |
| 310202              | 312008 | 1807   | -                        | ✓                     | -                       |
| 263655              | 265107 | 1453   | -                        | ✓                     | -                       |
| 217615              | 218657 | 1043   | -                        | -                     | ✓                       |
| 257653              | 261955 | 4303   | -                        | -                     | ✓                       |

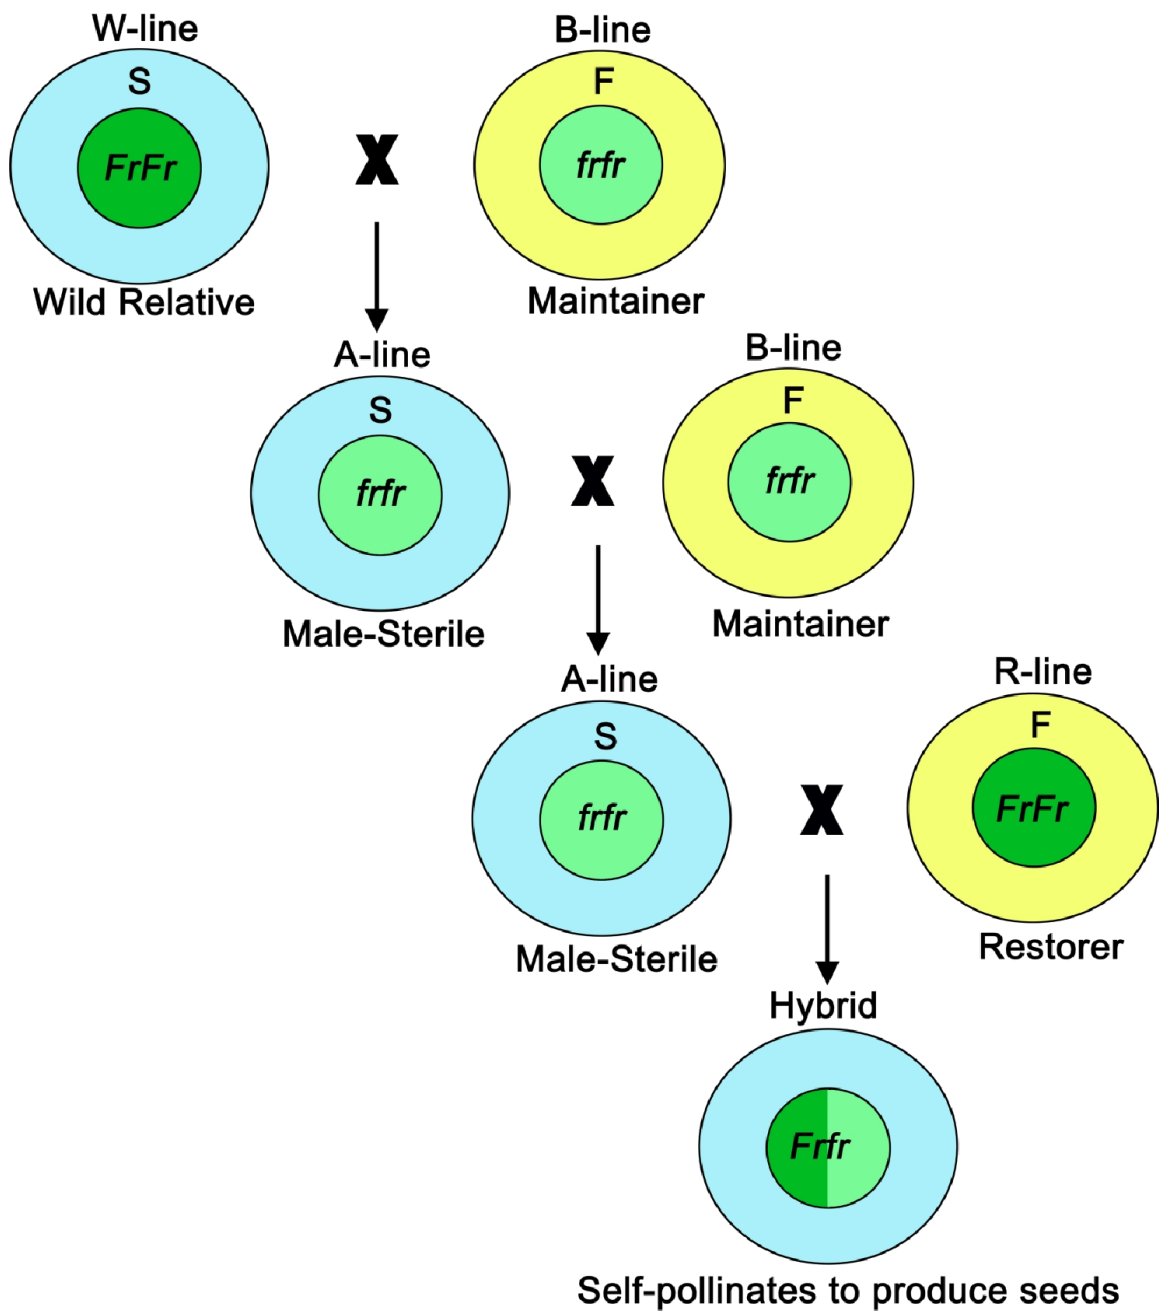

**Supplementary Figure S1.** A general methodology for the production of commercial hybrids by using cytoplasmic male sterility system.

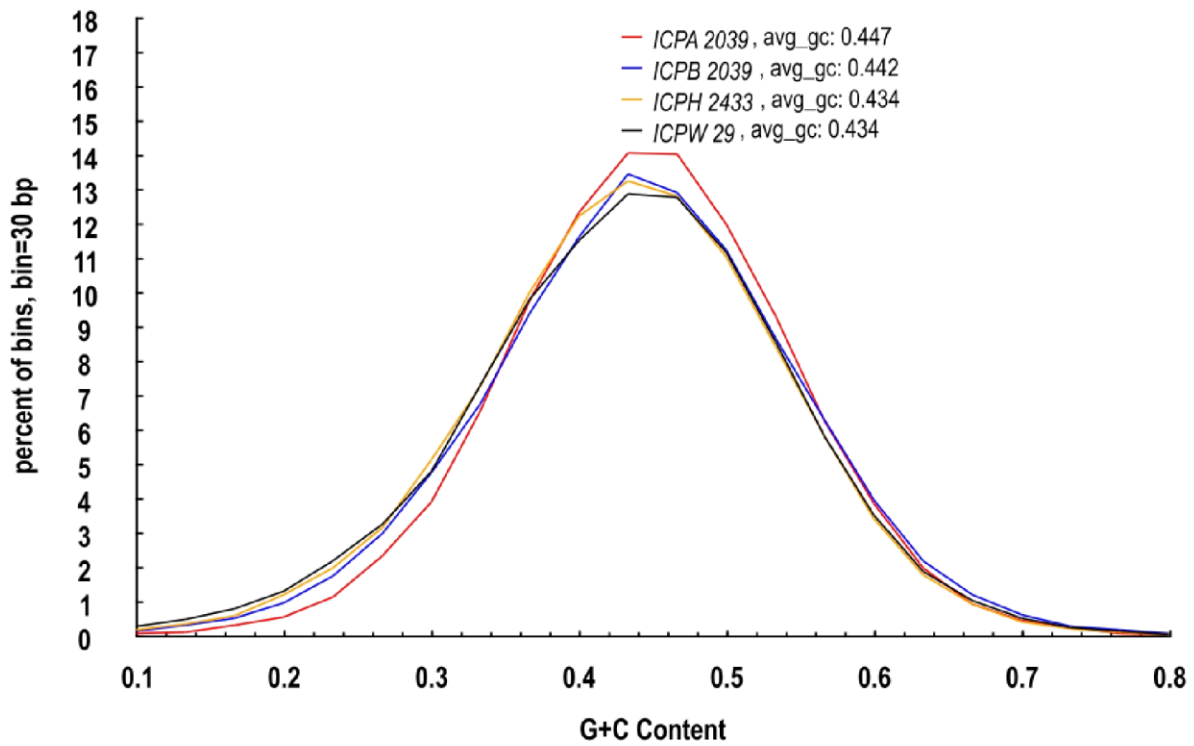

**Supplemental Figure S2.** Graph represents GC content distribution in mitochondrial genomes of ICPA 2039, ICPB 2039, ICPH 2433 and ICPW 29 in red, blue, yellow and black colours respectively.

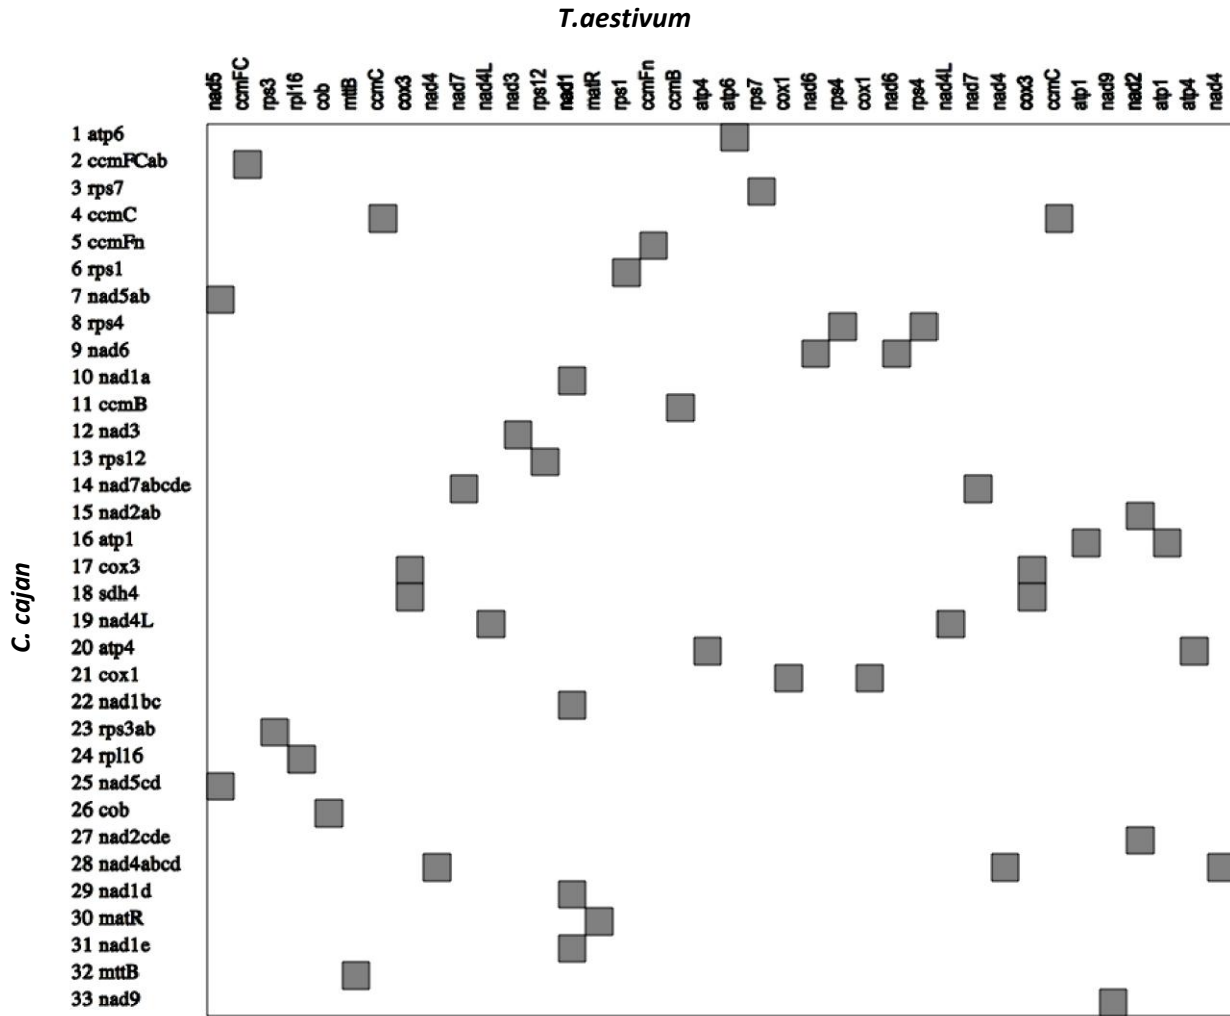

**Supplemental Figure S3.** Correlation of gene order between the mitochondrial gene maps of *Cajanus cajan* and *Triticum aestivum*.

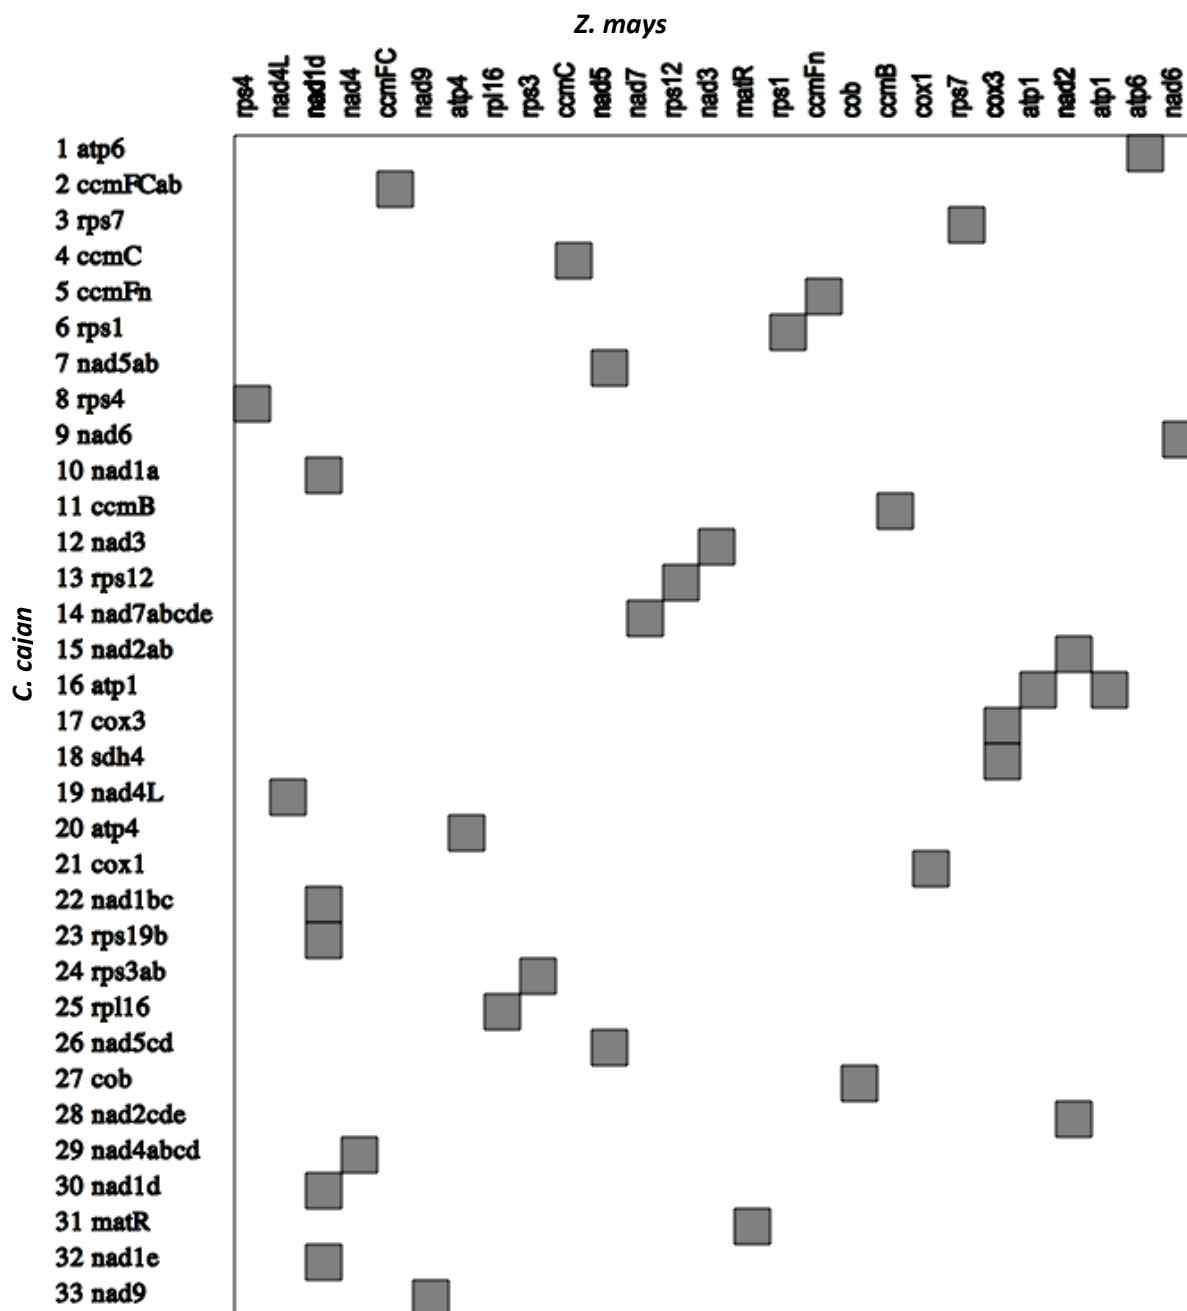

**Supplemental Figure S4.** Correlation of gene order between the mitochondrial gene maps of *Cajanus cajan* and *Zea mays*.

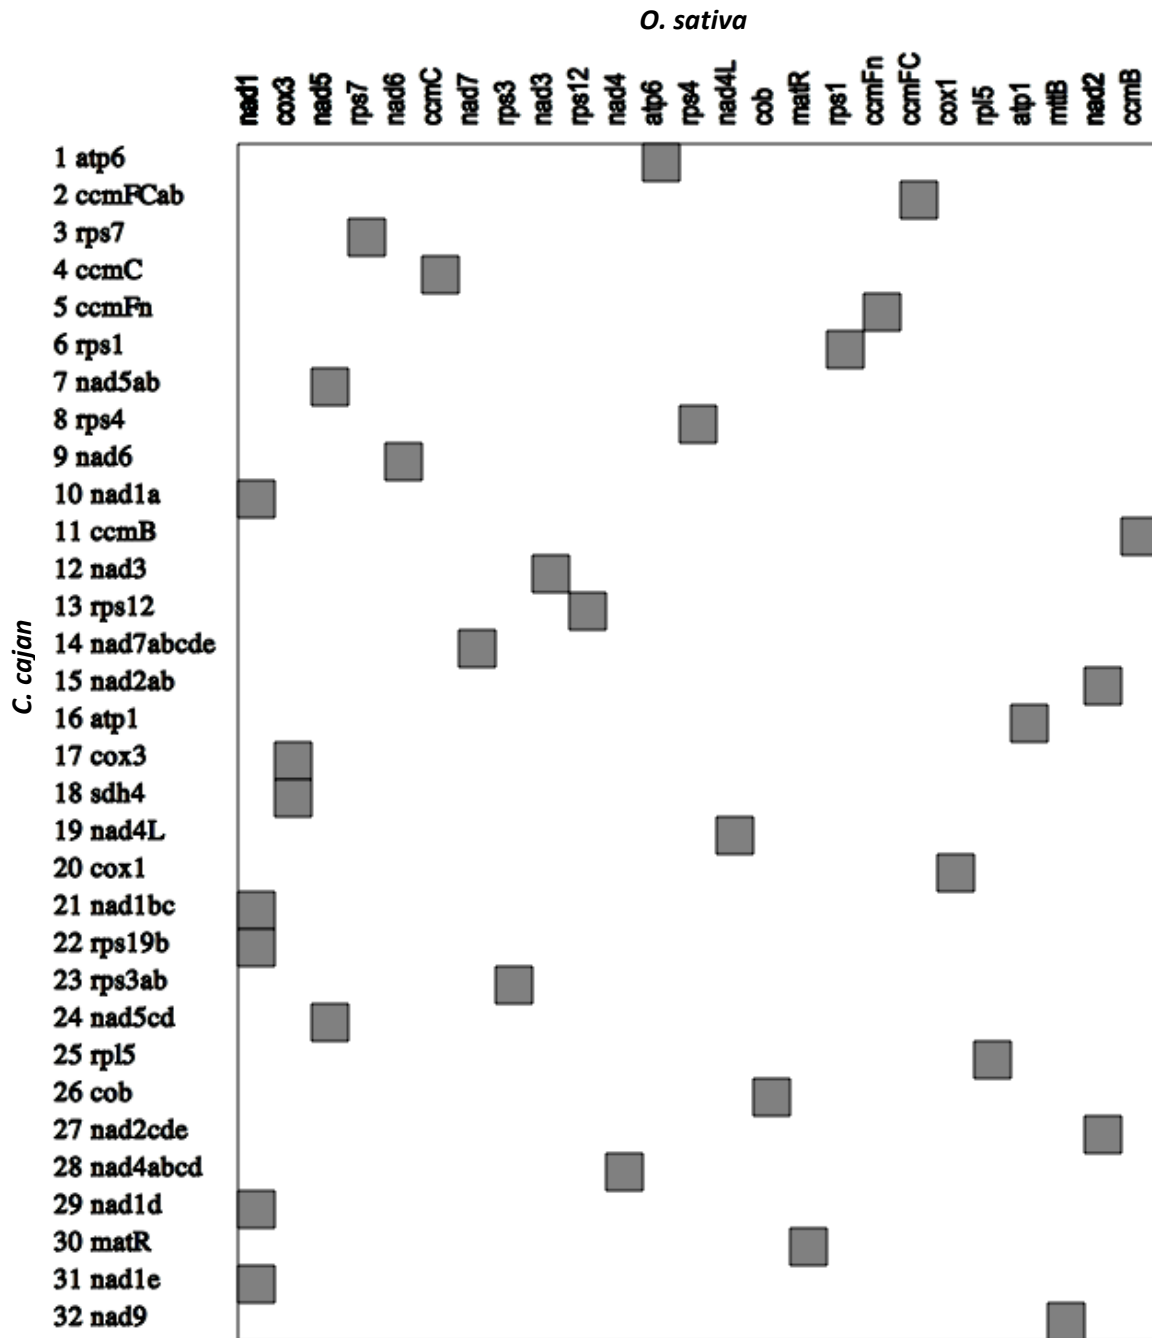

**Supplemental Figure S5.** Correlation of gene order between the mitochondrial gene maps of *Cajanus cajan* and *Oryza sativa*.



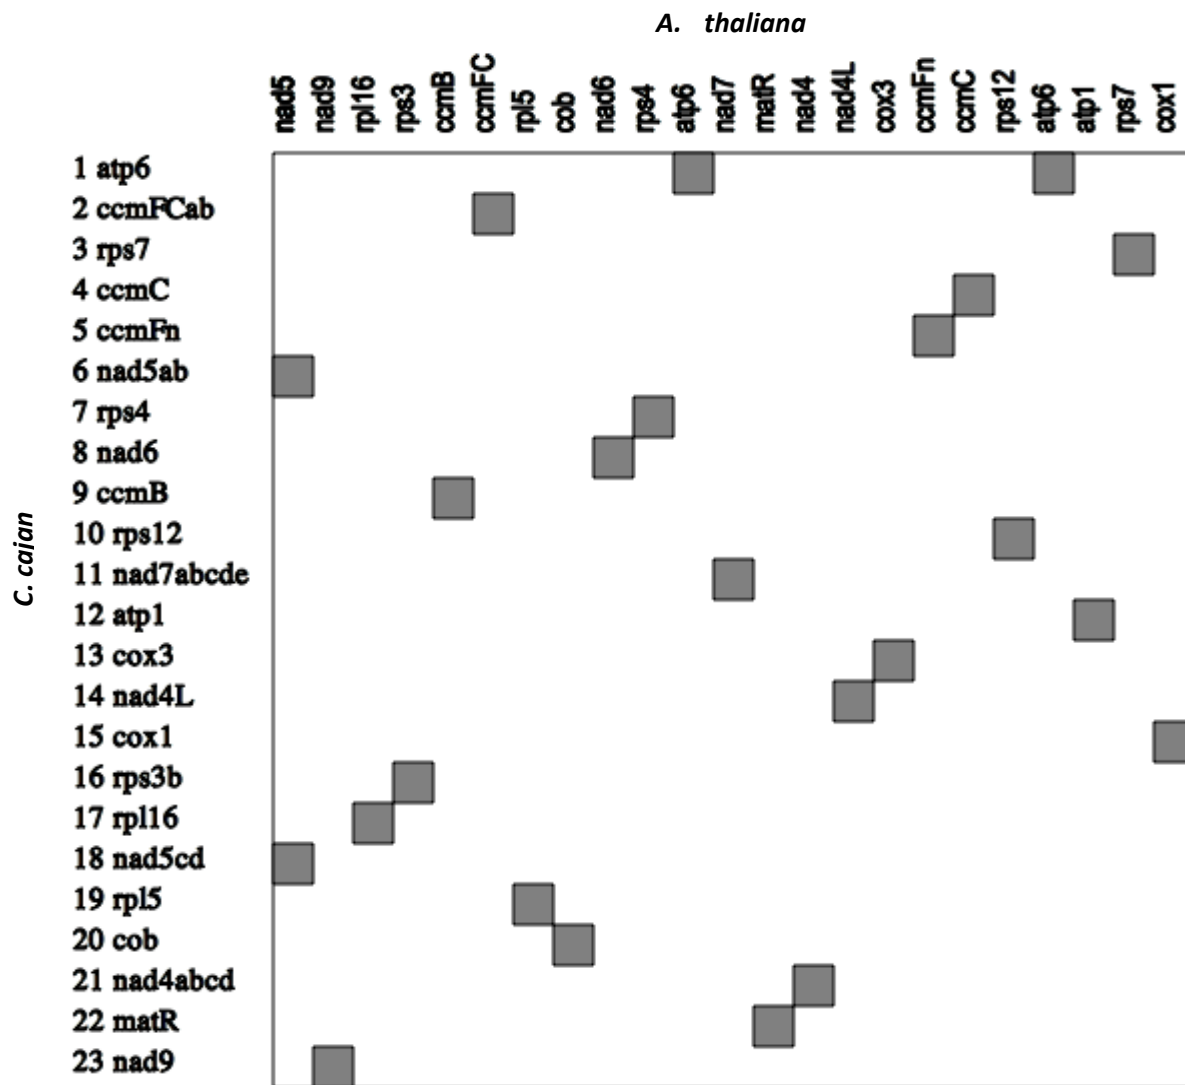

**Supplemental Figure S6.** Correlation of gene order between the mitochondrial gene maps of *Cajanus cajan* and *Arabidopsis thaliana*.

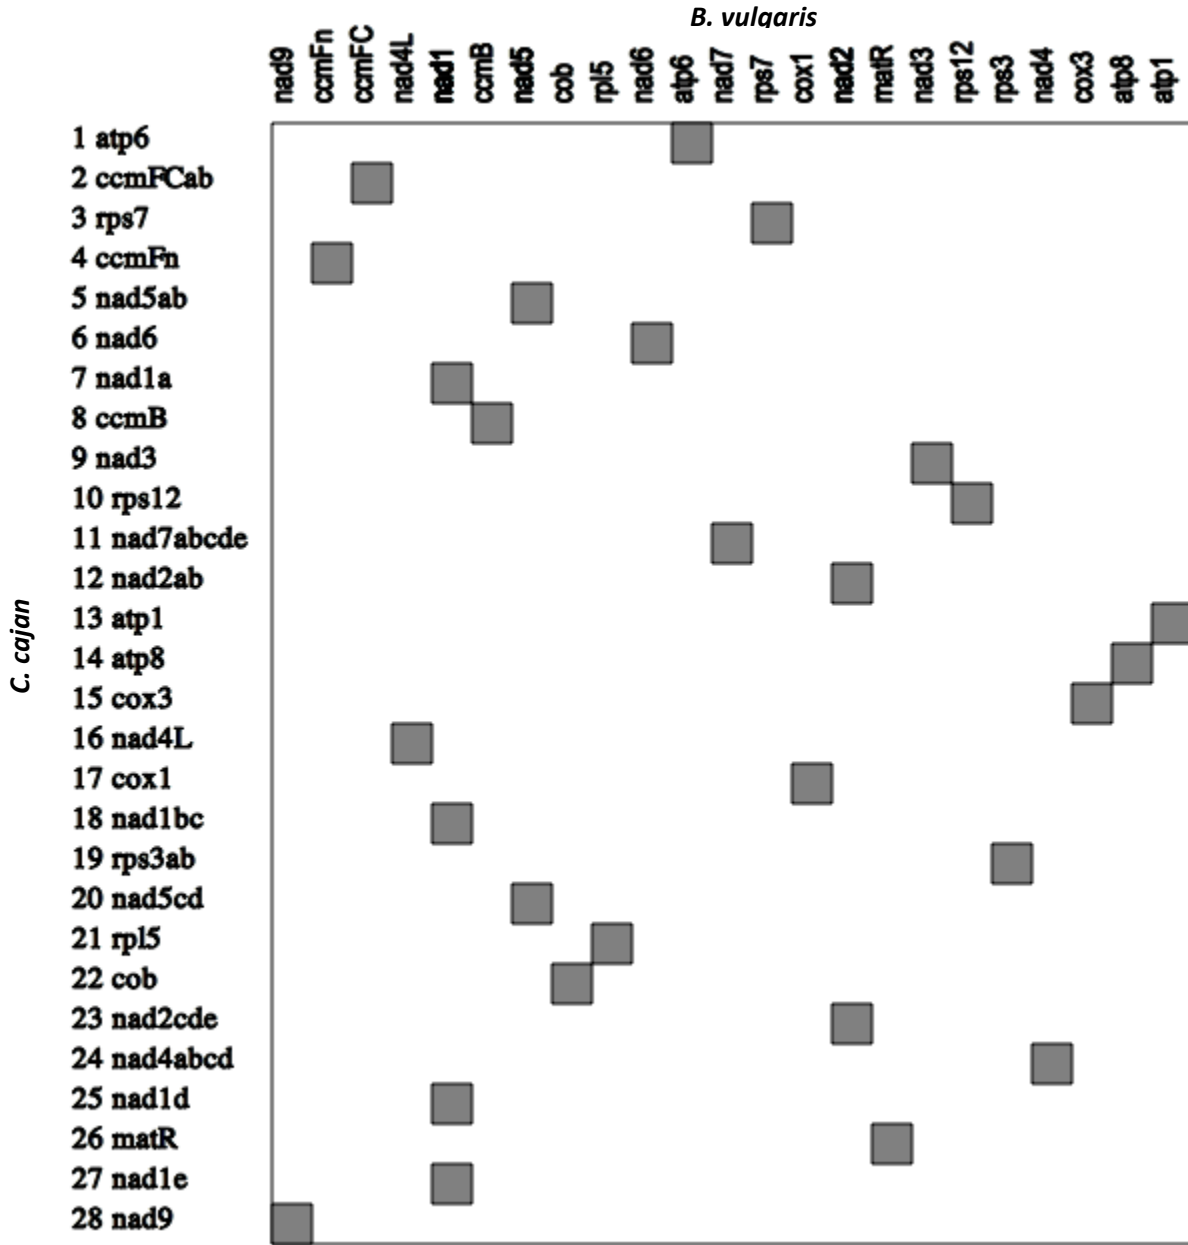

**Supplemental Figure S7.** Correlation of gene order between the mitochondrial gene maps of *Cajanus cajan* and *Beta vulgaris*.

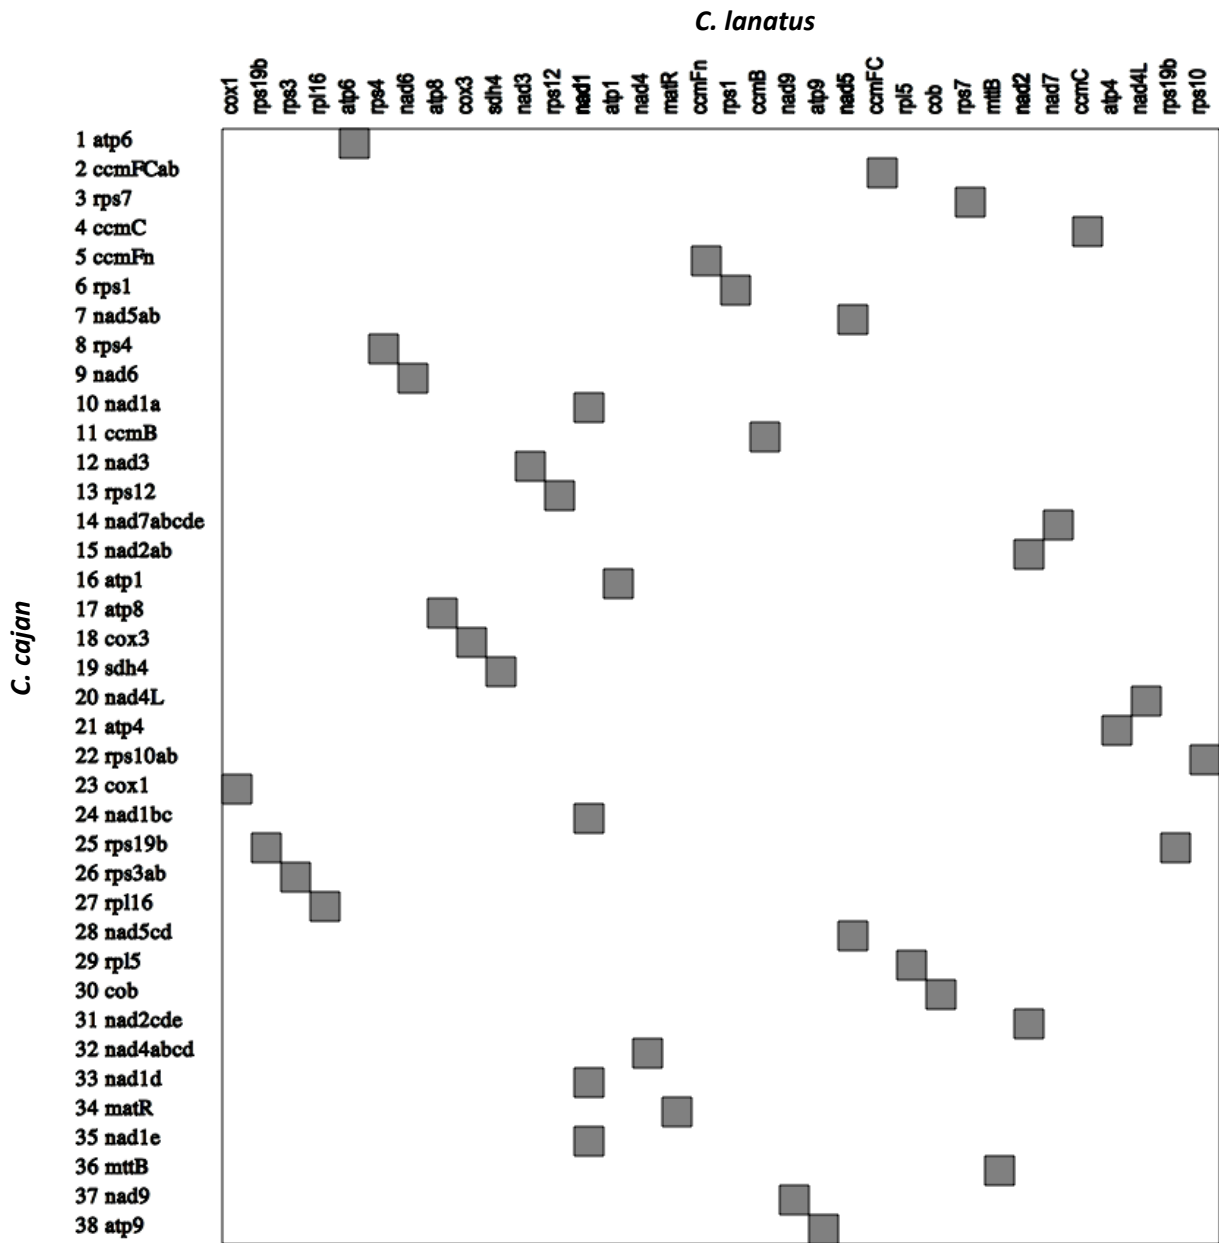

**Supplemental Figure S8.** Correlation of gene order between the mitochondrial gene maps of *Cajanus cajan* and *Citrullus lanatus*.

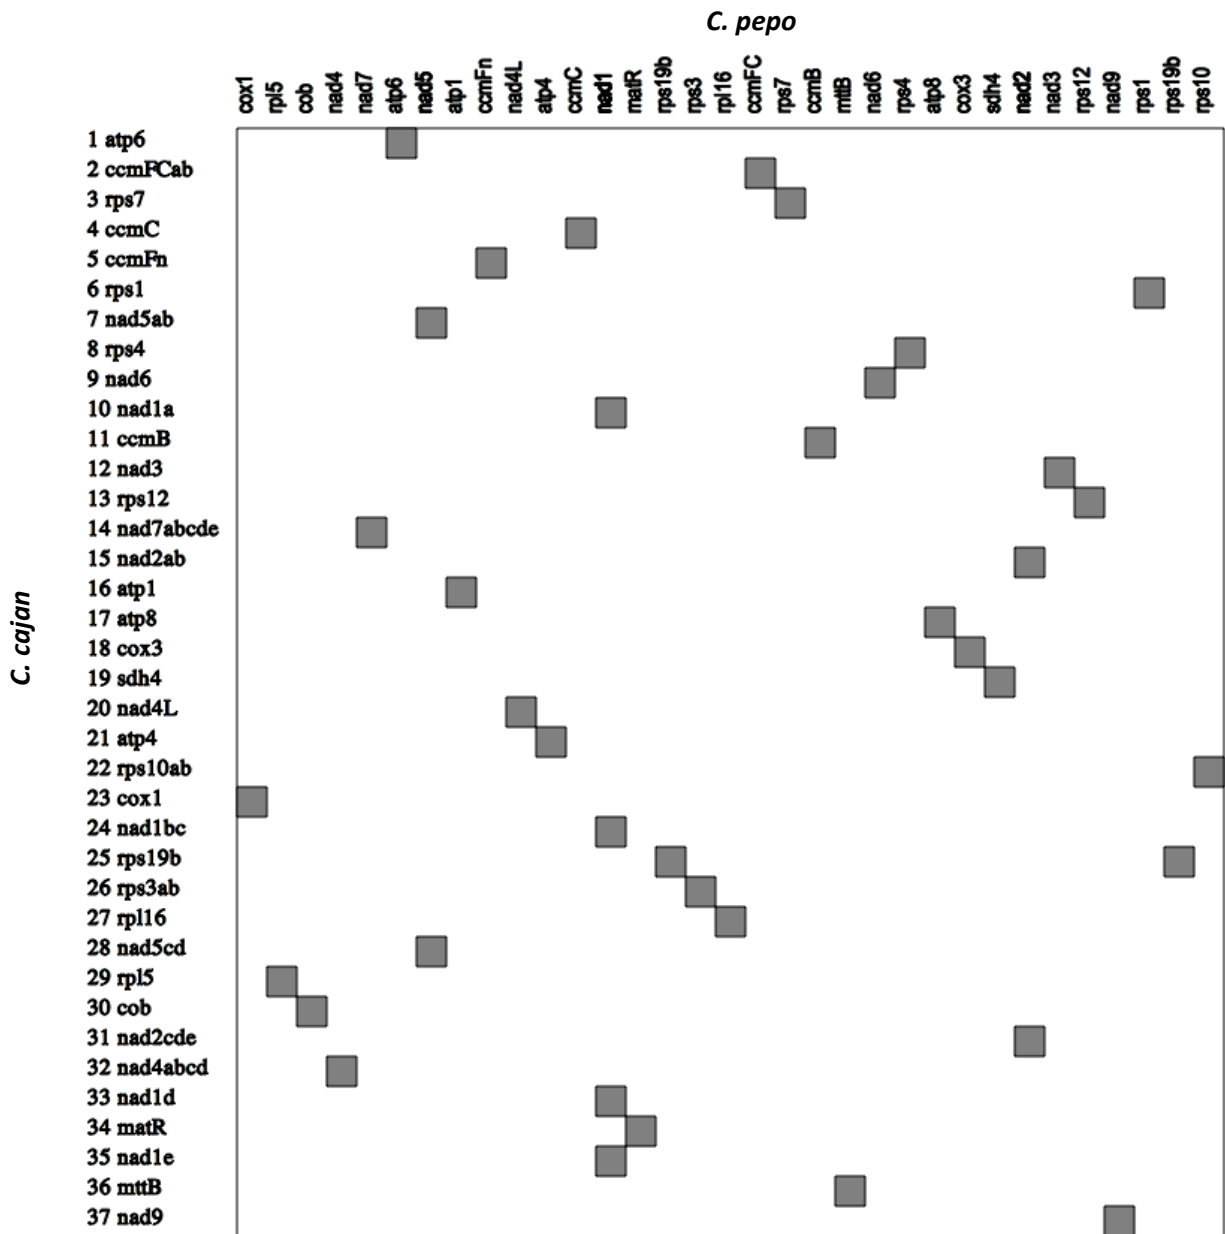

**Supplemental Figure S9.** Correlation of gene order between the mitochondrial gene maps of *Cajanus cajan* and *Cucurbita pepo*.

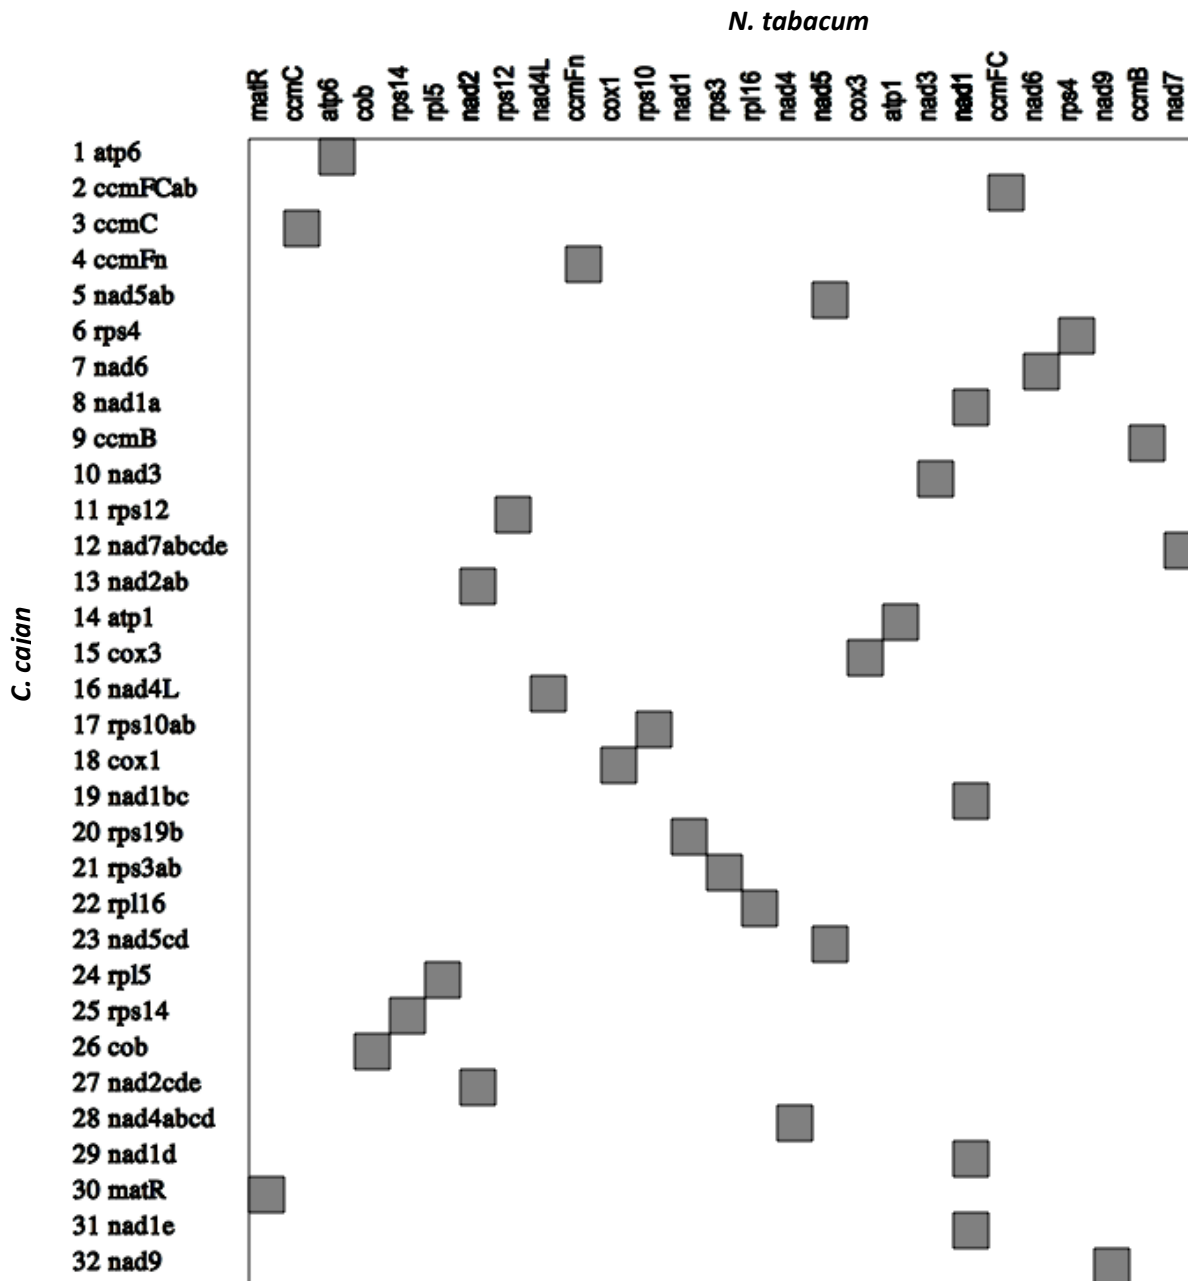

**Supplemental Figure S10.** Correlation of gene order between the mitochondrial gene maps of *Cajanus cajan* and *Nicotina tabacum*.

*V. vinifera*

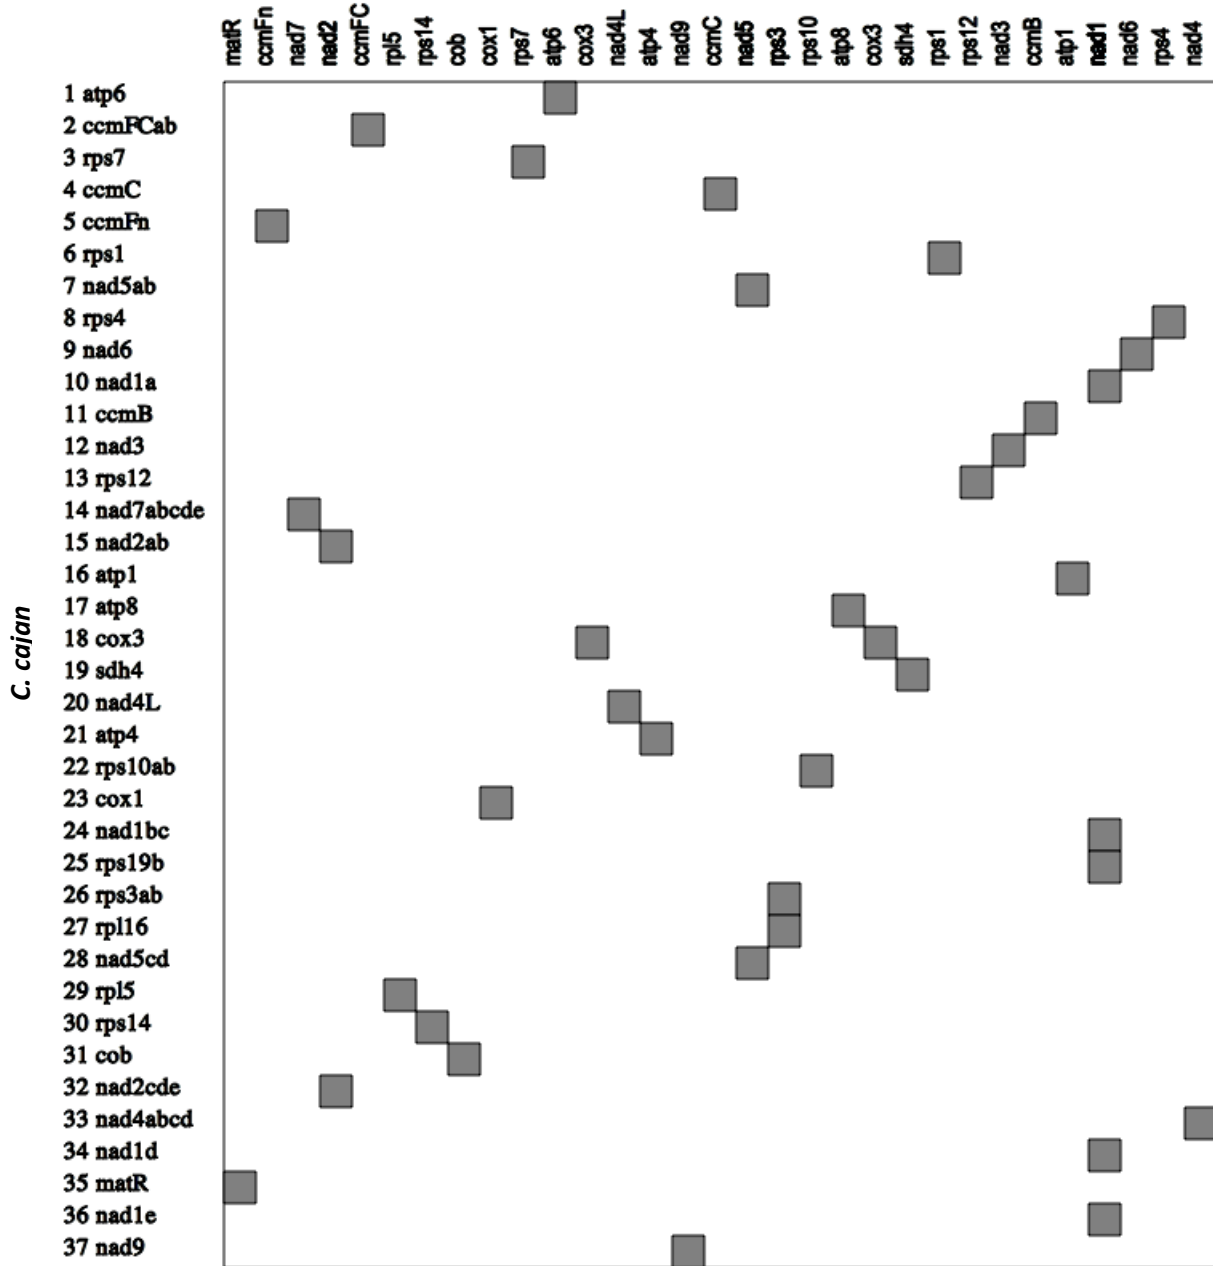

**Supplemental Figure S11.** Correlation of gene order between the mitochondrial gene maps of *Cajanus cajan* and *Vitis vinifera*.

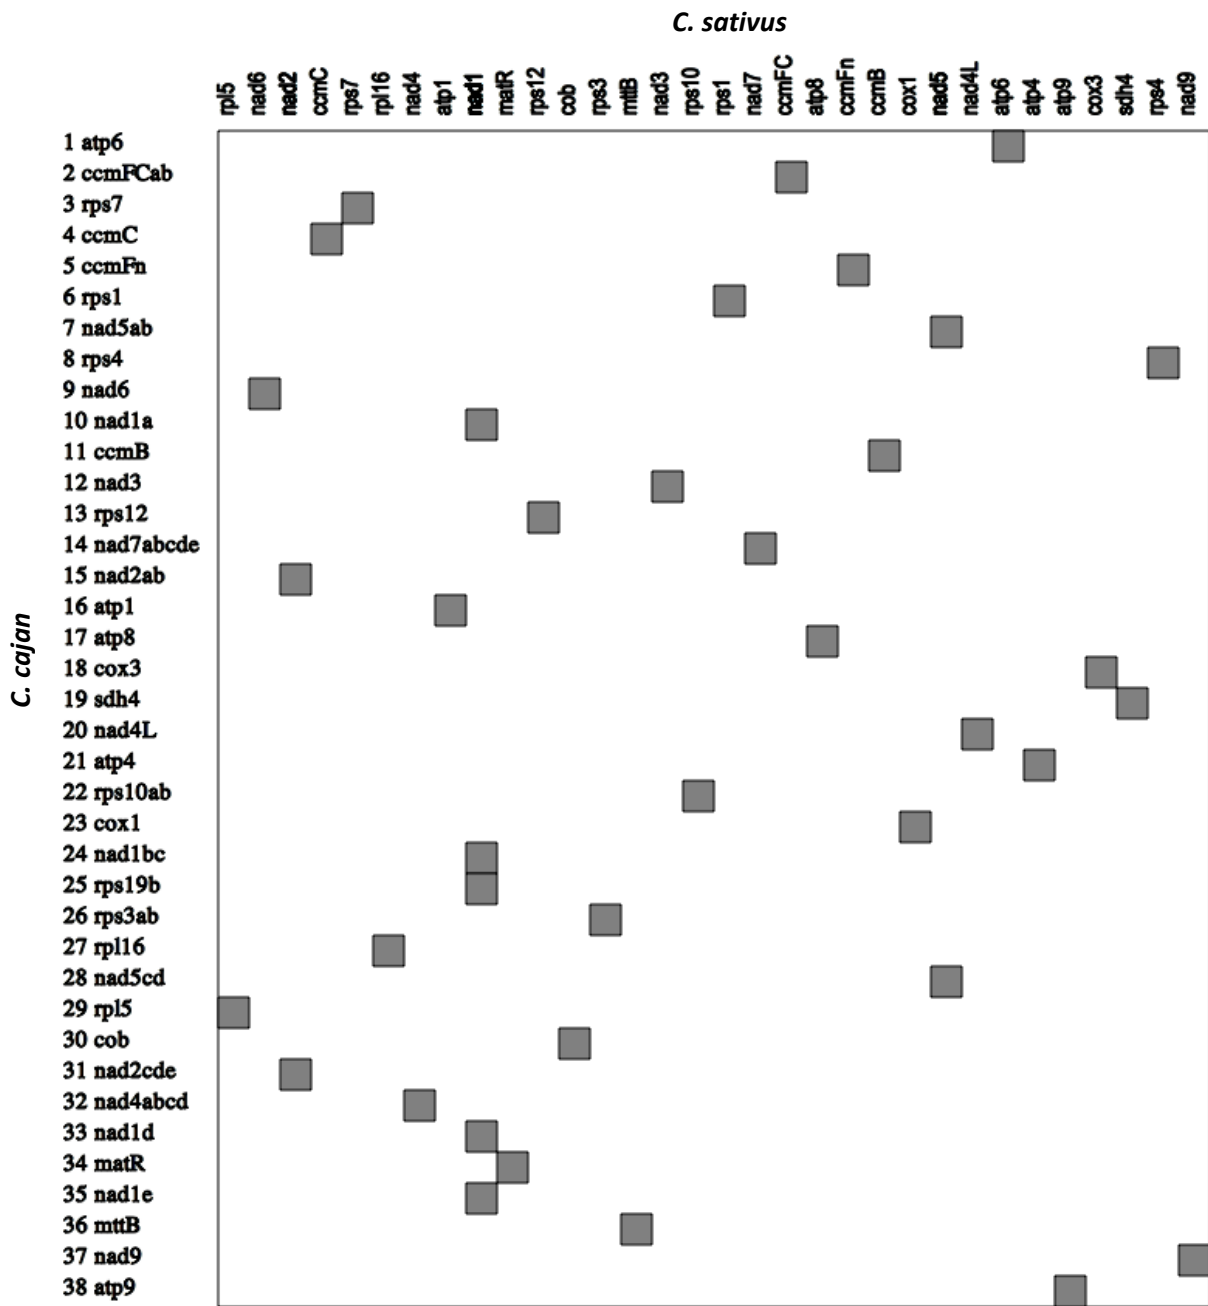

**Supplemental Figure S12.** Correlation of gene order between the mitochondrial gene maps of *Cajanus cajan* and *Cucumis sativus*.

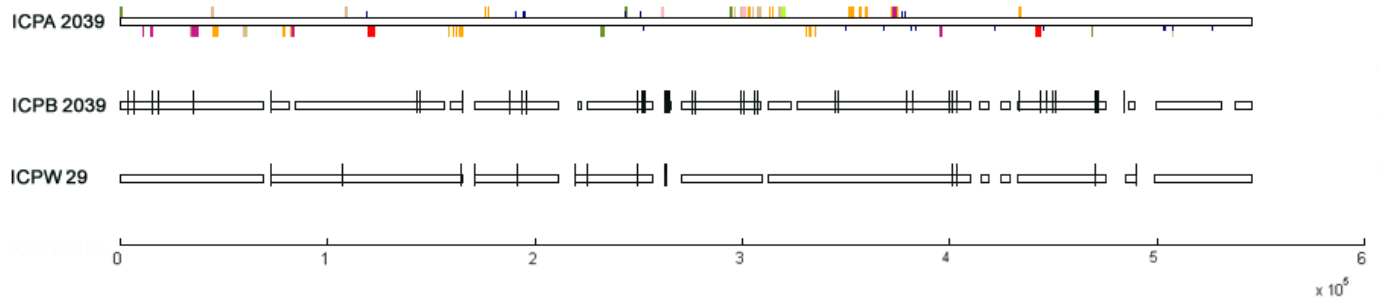

**Supplemental Figure S13.** Output of GS Reference Mapper 2.5. software which represents rearrangements and no-coverage regions identified after aligning additional sequence reads (as datasets were generated a second time) of ICPB 2039 and ICPW 29 to the final assembly of ICPA 2039.
